# Supplementary material
Source: MDPI journal article supplement (https://www.mdpi.com/1424-8247/17/5/544)
Supplement: s1 [file s1]

**Supplementary Table S1. Components of Herbal prescriptions**

| CGX                                       |            | BST                                       |                                         |
|-------------------------------------------|------------|-------------------------------------------|-----------------------------------------|
| Scientific name                           | Amount (g) | Scientific name                           | Amounts (g)                             |
| <i>Artemisia capillaries</i> Thunberg     | 0.660      | <i>Pinellia ternata</i> (Thunb.) Makino   | 1.178                                   |
| <i>Trionyx sinensis</i> Wiegmann          | 0.660      | <i>Scutellaria baicalensis</i> Georgi     | 0.840                                   |
| <i>Raphanus sativus</i> Linne             | 0.660      | <i>Panax ginseng</i> C.A. Meyer           | 0.803                                   |
| <i>Atractylodes macrocephala</i> Koidz    | 0.400      | <i>Glycyrrhiza uralensis</i> Fisch        | 0.732                                   |
| <i>Poria cocos</i> Wolf                   | 0.400      | <i>Ziziphus jujuba</i> Mill               | 0.512                                   |
| <i>Alisma orientalis</i> (Sam.) Juzepczuk | 0.400      | <i>Zingiber officinale</i> Roscoe (dried) | 0.500                                   |
| <i>Atractylodes chinensis</i> Koidzumi    | 0.400      | <i>Coptis chinensis</i> Franch            | 0.133                                   |
| <i>Salvia miltiorrhiza</i> Bunge          | 0.400      | <i>Zingiber officinale</i> Roscoe (fresh) | 0.077                                   |
| <i>Polyporus umbellatus</i> Fries         | 0.260      | <b>Myelophil</b>                          |                                         |
| <i>Poncirus trifoliata</i> Rafin          | 0.260      | Scientific name                           | Amounts (g)                             |
| <i>Amomum villosum</i> Lour               | 0.260      | <i>Astragalus membranaceus</i> Fisch      | 1.389                                   |
| <i>Glycyrrhiza uralensis</i> Fisch        | 0.130      | <i>Salvia miltiorrhiza</i> Bunge          | 1.389                                   |
| <i>Aucklandia lappa</i> Decne             | 0.130      | <b>Ginseng Extract Capsule</b>            | <i>Panax ginseng</i> C.A. Meyer 1 or 2g |

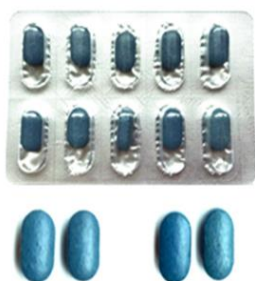

CGX tablet

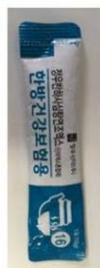

BST syrup

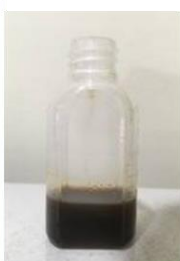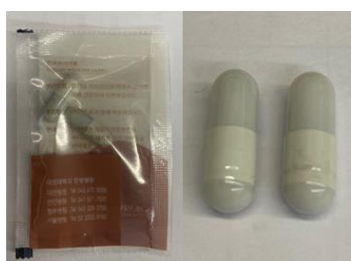

Myelophil capsule

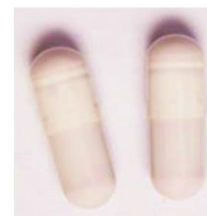

Ginseng capsule

## Supplementary Table S2. Molecular Fingerprinting of Myelophil and CGX

**Myelophil:** (A) Myelophil and five standards were subjected to UHPLC analysis.

(B) Myelophil and four major compounds were quantitative analyzed by LC/MS.

A

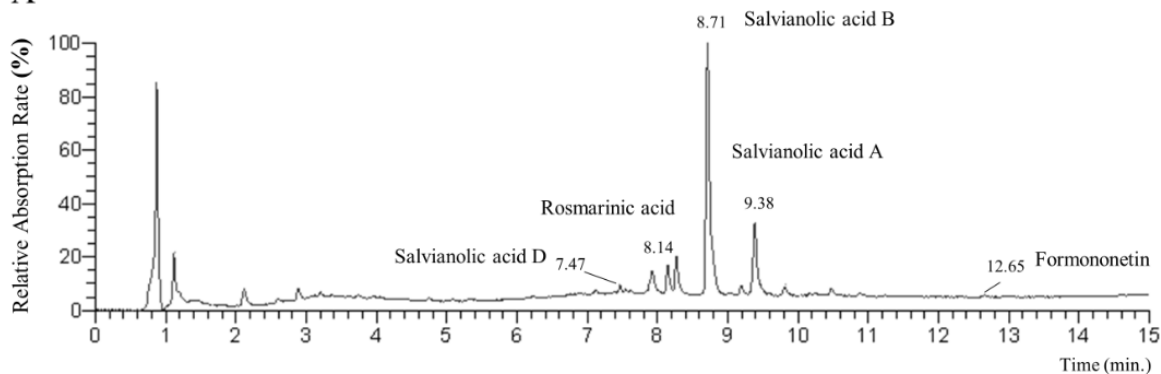

B

| Compounds          | Quantitative Analysis (mg/g of Myelophil) |               |              |
|--------------------|-------------------------------------------|---------------|--------------|
|                    | Astragali Radix                           | Salviae Radix | Myelophil    |
| Astragaloside IV   | 1.81 ± 0.01                               | Not detected  | 0.87 ± 0.01  |
| Formononetin       | 0.77 ± 0.01                               | Not detected  | 0.21 ± 0.01  |
| Salvianolic acid B | Not detected                              | 86.89 ± 0.19  | 36.21 ± 0.04 |
| Rosmarinic acid    | Not detected                              | 2.53 ± 0.01   | 1.03 ± 0.01  |

For detailed information on molecular fingerprinting analysis of Myelophil, please refer to Reference [24].

**CGX:** (A) CGX and its nine of main compounds were subjected to HPLC.

(B) The contents of each reference compounds in CGX.

A

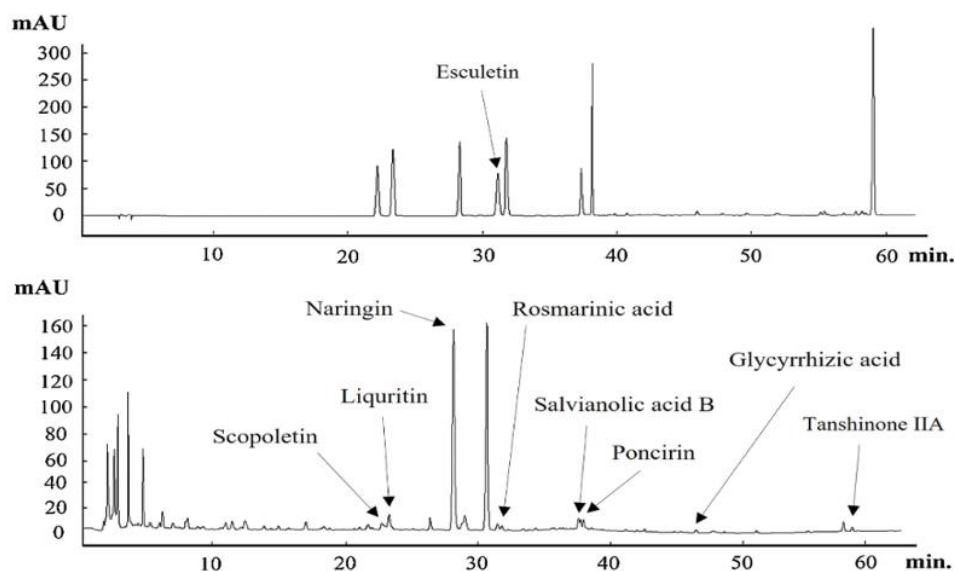

B

|                      | Scopoletin | Liquiritin | Naringin | Esculetin | Rosmarinic acid | Salvianolic acid B | Poncirin | Glycyrrhizic acid | Tanshinone IIA |
|----------------------|------------|------------|----------|-----------|-----------------|--------------------|----------|-------------------|----------------|
| Retention time (min) | 22.13      | 23.26      | 28.30    | 31.21     | 32.05           | 37.63              | 38.22    | 46.38             | 59.12          |
| Mean (μg/g of CGX)   | 5.064      | 17.927     | 228.792  | N.D.      | 7.153           | 21.864             | 6.632    | 51.452            | 1.823          |
| SD                   | 0.136      | 0.118      | 6.496    | N.D.      | 0.077           | 0.313              | 0.104    | 0.858             | 0.130          |

For detailed information on molecular fingerprinting analysis of CGX, please refer to Reference [27].

### Supplementary Table S3. Molecular Fingerprinting of BST and Ginseng Extract

**BST:** Fingerprint analysis of BST using ultra-high-performance liquid chromatography-tandem mass spectrometry (UHPLC-MS/MS)

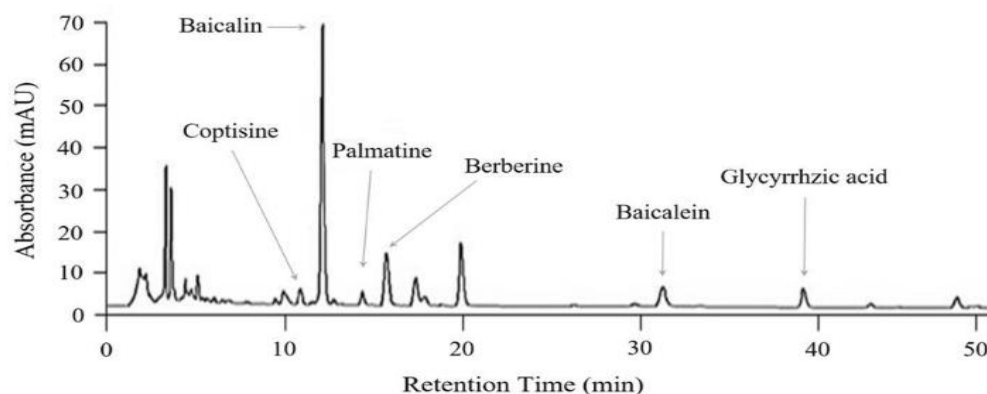

For detailed information on molecular fingerprinting analysis of BST, please refer to Reference [25].

#### Ginseng Extract: Compositional analysis of *Panax Ginseng* by HPLC.

| Protopanaxadiol | mg/g  | Protopanaxatriol | mg/g  |
|-----------------|-------|------------------|-------|
| Rb3             | 6.33  | Rg1              | 7.22  |
| Rb1             | 5.14  | Re               | 2.21  |
| Rb2             | 3.60  | Rg2              | 0.67  |
| Rc              | 2.61  | Rh1              | 0.58  |
| Rg3             | 1.08  | -                |       |
| Rd              | 0.43  | Others           | 825.8 |
| Rh2             | 0.002 | Crude saponins   | 144.9 |

*Panax Ginseng* (1g) was dissolved in 90% methanol and subjected to HPLC analysis. For detailed methodology, refer to Reference [29].

**Supplementary Table S4. Inclusion & Exclusion Criteria for CGX RCT [27]**

---

The inclusion criteria are as follows

---

- 1) Participants who are 18 - 65 years old
  - 2) Participants with chronic liver disorder caused by alcohol abuse or viral infection (Hepatitis B or Hepatitis C)
  - 3) Participants who underwent liver fibrosis with 5.5 kPa to 16 kPa of Liver Stiffness Measurement (LSM) value using Fibroscan
  - 4) Participants who are mentally healthy to follow the protocol properly
  - 5) Participants who can give informed consent to participate in this trial
- 

The exclusion criteria are as follows

---

- 1) Participants who take immunosuppressive drugs, cytotoxic or hormone therapy
  - 2) Participants with a history of ascites, variceal bleeding, or hepatic encephalopathy
  - 3) Participants with marked liver cirrhosis on ultrasonography or CT scan
  - 4) Participants diagnosed with esophageal varices on endoscopy
  - 5) Participants with jaundice (Total bilirubin > 3mg/dl) or bleeding tendency (INR > 2.0)
  - 6) Participants whose AST or ALT is more than 5 times of ULN
  - 7) Participants with low hemoglobin (< 10g/dl), low number of platelet (< 80,000/mm<sup>3</sup>), or high serum creatinine (> 1.2-fold of ULN)
  - 8) Participants who use currently alcohol or drugs
  - 9) Participants who have severe disorders of heart, lung kidney, blood, gall-bladder, or allergy
  - 10) Participants with a history of cancer
  - 11) Woman who are in period of pregnancy or lactation, or planning to have a baby
  - 12) Participants whose BMI is more than 30
  - 13) Participants who cannot understand and cannot follow this trial
  - 14) Participants who take ursodesoxycholic acid, silymarin, biphenyl dimethyl dicarboxylate, malotilate, colchicine, prophythiouracil (PTU), or anti-inflammatory agent
- 

ULN: upper limit of normal, BMI: body mass index

**Supplementary Table S5. Inclusion & Exclusion Criteria for Myelophil RCT [24]**

---

The inclusion criteria are as follows

---

1) Participants who are 18 - 65 years old

2) Participants who meet the definition of CFS according to CDC Criteria

Referred for severe chronic fatigue lasting more than 6 months, unrelieved by rest, and not attributed to other medical conditions. Additionally, the presence of at least four of the specified symptoms is required

① Postexertional malaise lasting more than 24 hours

② Unrefreshing sleep

③ Difficulty with thinking and memory

④ Muscle pain

⑤ Multiple joint pain without joint swelling or redness

⑥ Headache of a new type, pattern, or severity

⑦ Cervical or axillary lymphadenopathy

⑧ Sore throat

---

The exclusion criteria are as follows

---

1) Participants who take medication for chronic illness.

2) Participants who have diseases that induce chronic fatigue within the past 6 months. For example, hypothyroidism, anemia, or psychiatric disorders, etc.

3) Participants whose hemoglobin is lower than 12g/dL in men, 11g/dL in women.

4) Participants whose AST or ATL is more than 2 times the upper limit of normal, or creatinine is more than 1.2 times the upper limit of normal.

5) Participants with high-grade fatty liver on ultrasonography.

6) Participants with a history of cancer.

7) Participants who work at night.

8) Participants who drink more than twice a week.

9) Participants whose BMI is less than 16.5 or more than 30.

10) Participants who have undergone organ transplantation or take immunosuppressive medication.

11) Participants who have been treated for chronic fatigue during the last 2 months.

For example, medication, cognitive behavioral or exercise therapy.

12) Women who are pregnant or lactating.

13) Participants whose BDI is more than 25

14) Participants whose STAI is more than 60.

15) Participants who cannot understand and cannot follow this trial.

---

CFS: Chronic Fatigue Syndrome, CDC: US Centers for Disease Control and Prevention, BMI: Body Mass Index, BDI: Beck Depression Inventory), STAI: State-Trait Anxiety Inventory

**Supplementary Table S6. Inclusion & Exclusion Criteria for BST RCTs [25,26]**

---

The inclusion criteria are as follows

---

- 1) Participants who are 19 - 75 years old
  - 2) Experiencing dyspepsia symptoms, qualifying under the ROME III criteria
  - 3) Symptoms include early satiety, postprandial fullness, and epigastric pain or burning
  - 4) Symptoms not due to structural disease as confirmed by medical assessment, including upper endoscopy
  - 5) Duration of symptoms for more than 3 months with onset at least 6 months before enrollment
  - Presence of two or more moderate symptoms: epigastric pain, discomfort, stuffiness, fullness, burning, postprandial fullness, early satiety, and nausea
  - 6) A total symptom score of at least 6 points across eight symptoms, scored as: 0 (mild), 1 (moderate), 2 and 3 (severe)
  - 7) Excess pattern determined using an instrument of pattern identification for FD (applied only in one of the two BST RCTs [25])
  - 8) Participants who are mentally healthy to follow the protocol properly
  - 9) Participants who can give informed consent to participate in this trial
- 

The exclusion criteria are as follows

---

- 1) Participants with History of gastrointestinal surgery, except for appendectomy
  - 2) Participants who have Gastrointestinal bleeding, intestinal obstruction, gastrointestinal perforation, colorectal cancer, duodenitis, or stomach cancer.
  - 3) Participants with Severe hepatic dysfunction, congestive heart failure, renal failure
  - 4) Participants whose AST or ATL is more than 2 times the upper limit of normal, or creatinine is more than 1.2 times the upper limit of normal.
  - 5) Participants who have used NSAIDs, corticosteroids, or investigational study drugs within 30 days before study entry
  - 12) Woman who are pregnant or lactating.
  - 15) Participants who cannot understand and cannot follow this trial.
- 

NSAIDs: nonsteroidal anti-inflammatory drug

**Supple. Table S7. Inclusion & Exclusion Criteria for Ginseng RCT for Healthy Participants [28]**

---

The inclusion criteria are as follows

---

- 1) Participants aged between 20 and 60 years, self-identified as healthy.
  - 2) Participants who are mentally healthy to follow the protocol properly.
  - 3) Participants who can give informed consent to participate in this trial
- 

The exclusion criteria are as follows

---

- 1) Participants whose BMI is more than 30
  - 2) Participants with low hemoglobin (less than 10g/dl), a low platelet count (less than 80,000/mm<sup>3</sup>), or elevated serum creatinine (more than 1.2 times the upper limit of normal).
  - 3) Current users of alcohol or drugs.
  - 4) Participants whose AST or ALT levels are more than twice the upper limit of normal, or whose creatinine levels exceed 1.2 times the upper limit of normal.
  - 5) Women who are pregnant or lactating, including those trying to conceive during the study period.
  - 6) Participants currently taking any form of supplements or health functional foods, including but not limited to vitamins, minerals, and herbal supplements, to avoid potential interaction effects.
  - 7) Participants who cannot understand and cannot follow this trial.
- 

ULN: upper limit of normal, BMI: body mass index

**Supplementary Table S8. Inclusion & Exclusion Criteria for Ginseng RCT for Chronic Fatigue [29]**

---

The inclusion criteria are as follows

---

- 1) Participants aged 20-65 years experiencing chronic fatigue for more than 6 months
  - 2) Participants diagnosed with Idiopathic Chronic Fatigue (ICF), characterized by experiencing three or fewer of the eight symptoms typical of Chronic Fatigue Syndrome (CFS) without any other medical explanation.
  - 3) Participants who can give informed consent to participate in this trial
- 

The exclusion criteria are as follows

---

- 1) Participants with any hematological or radiological abnormalities related to fatigue
  - 2) Participants who have diseases that induce chronic fatigue within the past 6 months. For example, hypothyroidism, anemia, or psychiatric disorders, etc.
  - 3) Participants whose hemoglobin is lower than 12g/dL in men, 11g/dL in women.
  - 4) Participants whose AST or ATL is more than 2 times the upper limit of normal, or creatinine is more than 1.2 times the upper limit of normal.
  - 5) Participants with high-grade fatty liver on ultrasonography.
  - 6) Participants with a history of cancer.
  - 7) Participants who work at night.
  - 8) Participants who drink more than twice a week.
  - 9) Participants whose BMI is less than 16.5 or more than 30.
  - 10) Participants who have undergone organ transplantation or take immunosuppressive medication.
  - 11) Participants who have been treated for chronic fatigue during the last 2 months. For example, medication, cognitive behavioral or exercise therapy.
  - 12) Woman who are pregnant or lactating. Woman who have tried to get pregnant during childbearing age.
  - 13) Participants whose BDI is more than 25
  - 14) Participants whose STAI is more than 60.
  - 15) Participants who cannot understand and cannot follow this trial.
- 

BMI: Body Mass Index, BDI: Beck Depression Inventory, STAI: State-Trait Anxiety Inventory
